# Supplementary material for: Genome-wide identification of BcGRF genes in flowering Chinese cabbage and preliminary functional analysis of BcGRF8 in nitrogen metabolism
Source: PubMed Central journal article supplement (PMC10034182; doi:10.3389/fpls.2023.1144748), 2023-03-09
Supplement: Image_1.pdf [file Image_1.pdf]

*Supplementary Material*

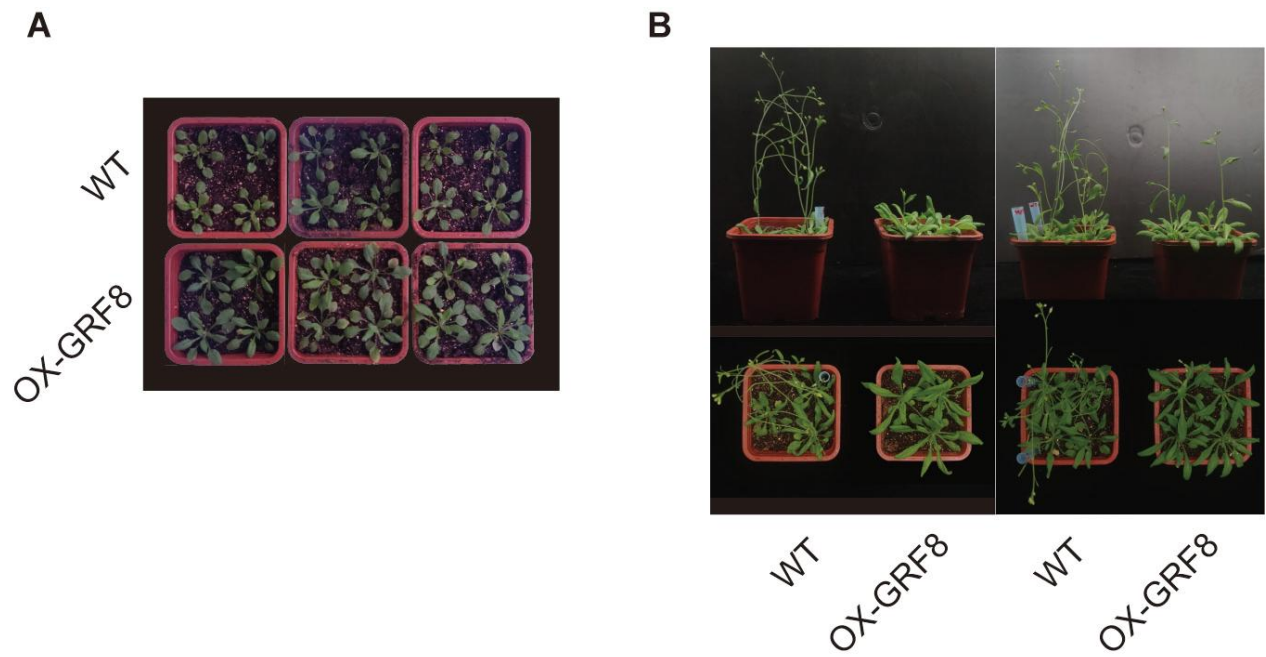

**Supplementary Figure 1.** Plants phenotypes of the BcGRF8-overexpression lines and WT under normal growth conditions.
